# Supplementary material for: An evolution-based DNA-binding residue predictor using a dynamic query-driven learning scheme
Source: Royal Society of Chemistry journal article supplement (doi:10.1039/c6mb00626d), 2016-10-05
Supplement: c6mb00626d1.pdf [file c6mb00626d1.pdf]

## SUPPLEMENTARY FILE FOR

### An Evolution-based DNA-binding Residues Predictor by Using Dynamic Query-driven Learning Scheme

Haiting Chai <sup>1</sup>, Jian Zhang <sup>1</sup>, Guifu Yang <sup>1,2,\*</sup>, Zhiqiang Ma <sup>1</sup>

<sup>1</sup>School of Computer Science and Information Technology, Northeast Normal University, Changchun, 130117, P.R. China

<sup>2</sup>Office of Informatization Management and Planning, Northeast Normal University, Changchun, 130117, P.R. China

\*Authors to whom correspondence should be addressed. Email: guifuyang.nenu@gmail.com (GFY)

The PDF file includes:

Table S1. The average position specific scores of twenty standard amino acids in our sample pool.

Table S2. Relative substitution possibilities of observed DBRs.

Table S3. Relative substitution possibilities of observed non-DBRs.

Table S4. Experimental results of DQPred-DBR on DNA\_T.

Table S5. Experimental results of DQPred-DBR on PDNA-41.

Figure S1. The distribution of DBRs- and non-DBRs-related CSP.

Figure S2. CSP of different substitution combinations.

Datasets with DNA-binding proteins with annotations based on the 3.5Å cut-off.

Supplementary Table S1. The average position specific scores of twenty standard amino acids in our sample pool.

|   | A     | R     | N     | D     | C     | Q     | E     | G     | H     | I     | L     | K     | M     | F     | P     | S     | T     | W     | Y     | V     |
|---|-------|-------|-------|-------|-------|-------|-------|-------|-------|-------|-------|-------|-------|-------|-------|-------|-------|-------|-------|-------|
| A | 2.34  | -1.18 | -1.29 | -1.56 | -1.10 | -0.82 | -0.84 | -0.76 | -1.62 | -1.18 | -1.39 | -0.76 | -1.07 | -2.08 | -1.39 | 0.44  | -0.27 | -2.90 | -1.78 | -0.58 |
| R | -1.29 | 3.98  | -0.54 | -1.38 | -3.13 | 0.54  | -0.14 | -2.24 | -0.50 | -2.45 | -2.09 | 1.62  | -1.51 | -2.68 | -2.07 | -0.78 | -1.04 | -2.99 | -1.81 | -2.28 |
| N | -1.23 | -0.35 | 3.78  | 0.62  | -2.58 | -0.10 | -0.10 | -0.82 | 0.04  | -2.71 | -2.76 | -0.02 | -1.98 | -2.76 | -1.86 | 0.33  | -0.32 | -3.42 | -1.95 | -2.43 |
| D | -1.42 | -1.11 | 0.83  | 4.13  | -3.28 | -0.08 | 1.35  | -1.39 | -0.89 | -2.89 | -3.12 | -0.38 | -2.53 | -3.21 | -1.59 | -0.24 | -0.94 | -3.79 | -2.54 | -2.72 |
| C | -0.85 | -3.04 | -2.76 | -3.45 | 6.68  | -2.76 | -3.26 | -2.86 | -3.04 | -1.39 | -1.52 | -2.85 | -1.69 | -2.45 | -3.23 | -1.30 | -1.30 | -3.21 | -2.45 | -1.11 |
| Q | -0.85 | 0.59  | -0.22 | -0.38 | -2.80 | 3.28  | 1.09  | -1.88 | -0.10 | -2.24 | -1.94 | 0.82  | -1.01 | -2.68 | -1.56 | -0.28 | -0.72 | -2.72 | -1.65 | -1.93 |
| E | -0.85 | -0.09 | -0.13 | 1.15  | -3.23 | 1.08  | 3.42  | -1.82 | -0.48 | -2.52 | -2.44 | 0.63  | -1.85 | -2.84 | -1.39 | -0.25 | -0.78 | -3.15 | -1.96 | -2.16 |
| G | -0.33 | -1.75 | -0.36 | -1.05 | -2.73 | -1.46 | -1.46 | 4.26  | -1.80 | -3.34 | -3.30 | -1.19 | -2.62 | -3.12 | -2.07 | -0.32 | -1.50 | -3.18 | -2.82 | -2.85 |
| H | -1.54 | -0.36 | 0.06  | -1.05 | -2.83 | -0.03 | -0.40 | -2.17 | 5.21  | -2.59 | -2.33 | -0.59 | -1.72 | -1.49 | -2.18 | -0.85 | -1.39 | -2.47 | 0.47  | -2.47 |
| I | -1.27 | -2.50 | -2.89 | -3.13 | -1.57 | -2.36 | -2.66 | -3.53 | -2.78 | 3.28  | 1.29  | -2.34 | 0.72  | -0.26 | -2.83 | -2.07 | -0.97 | -2.67 | -1.21 | 1.83  |
| L | -1.47 | -2.14 | -2.98 | -3.35 | -1.71 | -2.03 | -2.57 | -3.49 | -2.55 | 1.41  | 2.98  | -2.23 | 1.22  | 0.13  | -2.87 | -2.18 | -1.27 | -2.09 | -0.99 | 0.57  |
| K | -0.88 | 1.60  | -0.21 | -0.68 | -2.91 | 0.71  | 0.52  | -1.75 | -0.72 | -2.37 | -2.21 | 3.26  | -1.46 | -2.75 | -1.40 | -0.32 | -0.74 | -3.06 | -1.84 | -2.04 |
| M | -1.12 | -1.53 | -2.23 | -2.74 | -1.88 | -1.04 | -1.91 | -2.89 | -1.94 | 0.78  | 1.23  | -1.43 | 3.74  | -0.42 | -2.65 | -1.54 | -0.96 | -2.17 | -1.10 | 0.22  |
| F | -2.02 | -2.63 | -2.85 | -3.42 | -2.34 | -2.63 | -2.87 | -3.32 | -1.34 | -0.15 | 0.26  | -2.66 | -0.19 | 4.73  | -3.41 | -2.29 | -1.90 | -0.06 | 2.07  | -0.77 |
| P | -0.84 | -1.51 | -1.47 | -1.25 | -2.90 | -1.00 | -0.81 | -2.02 | -1.83 | -2.40 | -2.46 | -0.72 | -2.28 | -3.16 | 5.49  | -0.67 | -0.99 | -3.63 | -2.60 | -2.07 |
| S | 0.27  | -0.70 | 0.25  | -0.43 | -1.58 | -0.30 | -0.28 | -0.73 | -0.99 | -2.12 | -2.23 | -0.25 | -1.59 | -2.44 | -1.22 | 2.38  | 0.59  | -3.04 | -1.86 | -1.72 |
| T | -0.36 | -0.94 | -0.40 | -1.11 | -1.60 | -0.72 | -0.78 | -1.83 | -1.53 | -1.06 | -1.42 | -0.61 | -1.07 | -2.14 | -1.51 | 0.67  | 2.89  | -2.95 | -1.82 | -0.66 |
| W | -2.28 | -2.35 | -3.04 | -3.48 | -2.56 | -1.95 | -2.56 | -2.83 | -1.78 | -1.91 | -1.28 | -2.41 | -1.28 | 0.92  | -3.46 | -2.39 | -2.16 | 8.41  | 1.55  | -2.20 |
| Y | -1.84 | -1.84 | -2.07 | -2.87 | -2.49 | -1.70 | -2.05 | -3.09 | 0.62  | -1.14 | -0.91 | -1.84 | -1.01 | 2.13  | -3.02 | -1.84 | -1.77 | 0.61  | 5.17  | -1.26 |
| V | -0.60 | -2.24 | -2.58 | -2.87 | -1.28 | -1.97 | -2.22 | -3.03 | -2.59 | 2.00  | 0.61  | -1.98 | 0.25  | -0.83 | -2.46 | -1.60 | -0.49 | -2.77 | -1.27 | 2.74  |

Supplementary Table S2. Relative substitution possibilities of observed DBRs.

|   | A     | R     | N     | D     | C     | Q     | E     | G     | H     | I     | L     | K     | M     | F     | P     | S     | T     | W     | Y     | V     |
|---|-------|-------|-------|-------|-------|-------|-------|-------|-------|-------|-------|-------|-------|-------|-------|-------|-------|-------|-------|-------|
| A | 0.40  | 0.04  | 0.01  | -0.27 | -0.35 | 0.06  | -0.26 | 0.39  | -0.07 | -0.39 | -0.56 | 0.11  | -0.22 | -0.46 | 0.04  | 0.57  | 0.43  | -0.14 | -0.36 | -0.16 |
| R | -0.60 | 1.22  | -0.43 | -0.79 | -0.55 | -0.27 | -0.73 | -0.53 | -0.33 | -0.82 | -0.68 | 0.15  | -0.50 | -0.68 | -0.52 | -0.39 | -0.46 | -0.23 | -0.49 | -0.74 |
| N | -0.64 | -0.25 | 1.31  | -0.51 | -0.54 | -0.43 | -0.72 | -0.35 | -0.13 | -0.59 | -0.72 | -0.28 | -0.41 | -0.44 | -0.48 | -0.04 | -0.09 | -0.56 | -0.38 | -0.52 |
| D | -0.39 | -0.50 | -0.13 | 0.71  | -0.37 | -0.48 | -0.39 | -0.03 | -0.19 | -0.50 | -0.58 | -0.65 | -0.53 | -0.38 | -0.49 | 0.15  | -0.26 | -0.54 | -0.25 | -0.48 |
| C | -0.01 | 0.89  | 1.38  | 0.48  | -0.95 | 1.01  | 0.38  | 0.78  | 0.81  | -0.67 | -0.26 | 1.08  | -0.00 | 0.20  | 0.70  | 0.70  | 0.57  | 0.61  | 0.87  | -0.57 |
| Q | -0.27 | 0.15  | -0.29 | -0.67 | -0.45 | 1.16  | -0.57 | -0.31 | -0.25 | -0.67 | -0.60 | -0.12 | -0.25 | -0.65 | -0.29 | -0.18 | -0.12 | -0.29 | -0.40 | -0.28 |
| E | -0.52 | -0.11 | -0.09 | -0.22 | -0.35 | -0.22 | 0.58  | -0.21 | -0.15 | -0.69 | -0.69 | -0.48 | -0.48 | -0.39 | -0.42 | -0.10 | -0.44 | -0.35 | -0.44 | -0.48 |
| G | -0.23 | -0.58 | -0.54 | -0.78 | -0.48 | -0.63 | -0.92 | 1.05  | -0.64 | -0.87 | -0.79 | -0.64 | -0.58 | -0.60 | -0.48 | -0.18 | -0.48 | -0.25 | -0.64 | -0.70 |
| H | -0.73 | -0.46 | -0.26 | -0.83 | -0.94 | -0.64 | -0.84 | -0.57 | 1.84  | -1.17 | -1.09 | -0.63 | -0.90 | -0.69 | -0.83 | -0.55 | -0.62 | -0.69 | 0.03  | -1.10 |
| I | -0.08 | 0.20  | 0.15  | -0.04 | -0.25 | 0.06  | -0.19 | 0.16  | -0.15 | 0.04  | -0.59 | 0.08  | -0.18 | -0.41 | 0.11  | 0.25  | 0.30  | -0.39 | -0.39 | -0.06 |
| L | -0.01 | 0.38  | 0.23  | -0.03 | -0.35 | 0.44  | -0.05 | 0.04  | 0.02  | -0.68 | -0.21 | 0.32  | -0.02 | -0.54 | 0.12  | 0.32  | 0.18  | -0.34 | -0.30 | -0.42 |
| K | -0.25 | 0.40  | -0.30 | -0.66 | -0.29 | -0.20 | -0.61 | -0.29 | -0.29 | -0.52 | -0.52 | 0.90  | -0.29 | -0.53 | -0.33 | -0.15 | -0.19 | -0.30 | -0.37 | -0.40 |
| M | 0.20  | 0.37  | 0.34  | 0.02  | -0.23 | 0.41  | 0.03  | 0.25  | 0.11  | -0.62 | -0.68 | 0.28  | 0.49  | -0.23 | 0.14  | 0.35  | 0.31  | 0.01  | -0.11 | -0.39 |
| F | -0.62 | -0.42 | -0.27 | -0.47 | -0.55 | -0.44 | -0.54 | -0.39 | 0.05  | -0.95 | -0.93 | -0.43 | -0.82 | 0.73  | -0.54 | -0.35 | -0.51 | 0.38  | 0.51  | -0.94 |
| P | -0.04 | -0.16 | -0.44 | -0.73 | -0.20 | -0.33 | -0.69 | -0.19 | -0.39 | -0.48 | -0.48 | -0.35 | -0.32 | -0.43 | 0.43  | 0.10  | -0.04 | -0.25 | -0.40 | -0.42 |
| S | 0.09  | -0.17 | 0.03  | -0.50 | 0.05  | -0.22 | -0.56 | 0.19  | -0.24 | -0.42 | -0.45 | -0.17 | -0.24 | -0.39 | -0.19 | 0.87  | 0.25  | -0.29 | -0.31 | -0.30 |
| T | -0.18 | -0.19 | -0.15 | -0.57 | -0.24 | -0.28 | -0.68 | -0.18 | -0.36 | -0.48 | -0.52 | -0.17 | -0.39 | -0.61 | -0.22 | 0.34  | 1.29  | -0.39 | -0.49 | -0.34 |
| W | -0.94 | -0.54 | -0.79 | -0.91 | -0.46 | -0.74 | -0.94 | -0.41 | -0.80 | -1.23 | -1.22 | -0.90 | -0.88 | -0.41 | -0.79 | -0.61 | -0.73 | 1.25  | -0.23 | -1.15 |
| Y | -0.48 | -0.14 | -0.11 | -0.50 | -0.60 | -0.31 | -0.57 | -0.34 | 0.33  | -0.84 | -0.85 | -0.16 | -0.60 | 0.08  | -0.52 | -0.26 | -0.28 | -0.05 | 1.06  | -0.75 |
| V | -0.07 | 0.48  | 0.20  | -0.14 | -0.42 | 0.32  | -0.11 | -0.06 | -0.14 | -0.41 | -0.75 | 0.59  | -0.15 | -0.78 | 0.06  | 0.23  | 0.30  | -0.50 | -0.57 | 0.28  |

Supplementary Table S3. Relative substitution possibilities of observed non-DBRs.

|   | A     | R     | N     | D     | C     | Q     | E     | G     | H     | I     | L    | K     | M     | F     | P     | S     | T     | W     | Y     | V     |
|---|-------|-------|-------|-------|-------|-------|-------|-------|-------|-------|------|-------|-------|-------|-------|-------|-------|-------|-------|-------|
| A | -0.01 | -0.00 | -0.00 | 0.01  | 0.01  | -0.00 | 0.01  | -0.01 | 0.00  | 0.01  | 0.02 | -0.00 | 0.01  | 0.01  | -0.00 | -0.02 | -0.01 | 0.00  | 0.01  | 0.00  |
| R | 0.13  | -0.26 | 0.09  | 0.17  | 0.12  | 0.06  | 0.16  | 0.11  | 0.07  | 0.17  | 0.15 | -0.03 | 0.11  | 0.14  | 0.11  | 0.08  | 0.10  | 0.05  | 0.10  | 0.16  |
| N | 0.07  | 0.03  | -0.14 | 0.06  | 0.06  | 0.05  | 0.08  | 0.04  | 0.01  | 0.06  | 0.08 | 0.03  | 0.04  | 0.05  | 0.05  | 0.00  | 0.01  | 0.06  | 0.04  | 0.06  |
| D | 0.01  | 0.02  | 0.00  | -0.02 | 0.01  | 0.01  | 0.01  | 0.00  | 0.01  | 0.02  | 0.02 | 0.02  | 0.02  | 0.01  | 0.02  | -0.00 | 0.01  | 0.02  | 0.01  | 0.02  |
| C | -0.00 | -0.02 | -0.03 | -0.01 | 0.02  | -0.02 | -0.01 | -0.02 | -0.02 | 0.02  | 0.01 | -0.02 | -0.00 | -0.00 | -0.02 | -0.02 | -0.01 | -0.01 | -0.02 | 0.01  |
| Q | 0.02  | -0.01 | 0.02  | 0.06  | 0.04  | -0.10 | 0.05  | 0.03  | 0.02  | 0.06  | 0.05 | 0.01  | 0.02  | 0.05  | 0.02  | 0.01  | 0.01  | 0.02  | 0.03  | 0.02  |
| E | 0.01  | 0.00  | 0.00  | 0.01  | 0.01  | 0.00  | -0.01 | 0.00  | 0.00  | 0.02  | 0.02 | 0.01  | 0.01  | 0.01  | 0.01  | 0.00  | 0.01  | 0.01  | 0.01  | 0.01  |
| G | 0.02  | 0.04  | 0.04  | 0.05  | 0.03  | 0.04  | 0.06  | -0.07 | 0.04  | 0.06  | 0.05 | 0.04  | 0.04  | 0.04  | 0.03  | 0.01  | 0.03  | 0.02  | 0.04  | 0.05  |
| H | 0.09  | 0.05  | 0.03  | 0.10  | 0.11  | 0.08  | 0.10  | 0.07  | -0.22 | 0.14  | 0.13 | 0.07  | 0.11  | 0.08  | 0.10  | 0.07  | 0.07  | 0.08  | -0.00 | 0.13  |
| I | 0.00  | -0.01 | -0.00 | 0.00  | 0.01  | -0.00 | 0.01  | -0.00 | 0.00  | -0.00 | 0.02 | -0.00 | 0.00  | 0.01  | -0.00 | -0.01 | -0.01 | 0.01  | 0.01  | 0.00  |
| L | 0.00  | -0.01 | -0.00 | 0.00  | 0.01  | -0.01 | 0.00  | -0.00 | -0.00 | 0.01  | 0.00 | -0.01 | -0.00 | 0.01  | -0.00 | -0.01 | -0.00 | 0.01  | 0.00  | 0.01  |
| K | 0.03  | -0.06 | 0.04  | 0.09  | 0.04  | 0.03  | 0.08  | 0.04  | 0.04  | 0.07  | 0.07 | -0.12 | 0.04  | 0.07  | 0.05  | 0.02  | 0.03  | 0.04  | 0.05  | 0.06  |
| M | -0.01 | -0.02 | -0.02 | -0.00 | 0.01  | -0.02 | -0.00 | -0.01 | -0.01 | 0.03  | 0.03 | -0.01 | -0.02 | 0.01  | -0.01 | -0.02 | -0.01 | -0.00 | 0.01  | 0.02  |
| F | 0.03  | 0.02  | 0.01  | 0.02  | 0.03  | 0.02  | 0.03  | 0.02  | -0.00 | 0.04  | 0.04 | 0.02  | 0.04  | -0.03 | 0.03  | 0.02  | 0.02  | -0.02 | -0.02 | 0.04  |
| P | 0.00  | 0.00  | 0.02  | 0.02  | 0.01  | 0.01  | 0.02  | 0.01  | 0.01  | 0.02  | 0.02 | 0.01  | 0.01  | 0.01  | -0.01 | -0.00 | 0.00  | 0.01  | 0.01  | 0.01  |
| S | -0.01 | 0.02  | -0.00 | 0.05  | -0.00 | 0.02  | 0.06  | -0.02 | 0.02  | 0.04  | 0.05 | 0.02  | 0.02  | 0.04  | 0.02  | -0.09 | -0.03 | 0.03  | 0.03  | 0.03  |
| T | 0.02  | 0.02  | 0.01  | 0.05  | 0.02  | 0.02  | 0.06  | 0.02  | 0.03  | 0.04  | 0.05 | 0.01  | 0.03  | 0.05  | 0.02  | -0.03 | -0.11 | 0.03  | 0.04  | 0.03  |
| W | 0.08  | 0.05  | 0.07  | 0.08  | 0.04  | 0.07  | 0.08  | 0.04  | 0.07  | 0.11  | 0.11 | 0.08  | 0.08  | 0.04  | 0.07  | 0.05  | 0.07  | -0.11 | 0.02  | 0.10  |
| Y | 0.05  | 0.02  | 0.01  | 0.06  | 0.07  | 0.04  | 0.06  | 0.04  | -0.04 | 0.10  | 0.10 | 0.02  | 0.07  | -0.01 | 0.06  | 0.03  | 0.03  | 0.01  | -0.12 | 0.08  |
| V | 0.00  | -0.01 | -0.00 | 0.00  | 0.01  | -0.01 | 0.00  | 0.00  | 0.00  | 0.01  | 0.02 | -0.01 | 0.00  | 0.02  | -0.00 | -0.01 | -0.01 | 0.01  | 0.01  | -0.01 |

Supplementary Table S4. Experimental results of DQPred-DBR on DNA\_T.

| Model     | Similarity Threshold | SN (%)      | SP (%)      | ACC (%)     | MCC          | AUC          |
|-----------|----------------------|-------------|-------------|-------------|--------------|--------------|
| Universal | N/A                  | 57.8        | 84.3        | 81.7        | 0.311        | 0.809        |
| Dynamic   | 90%                  | 60.5        | 87.4        | 84.8        | 0.374        | 0.821        |
|           | 80%                  | 61.1        | 87.8        | 85.3        | 0.385        | 0.832        |
|           | 70%                  | 61.5        | 87.7        | 85.2        | 0.385        | 0.831        |
|           | <b>60%</b>           | <b>61.9</b> | <b>87.7</b> | <b>85.2</b> | <b>0.388</b> | <b>0.835</b> |
|           | 50%                  | 61.6        | 87.7        | 85.2        | 0.386        | 0.833        |
|           | 40%                  | 60.8        | 87.9        | 85.3        | 0.384        | 0.831        |

Supplementary Table S5. Experimental results of DQPred-DBR on PDNA-41.

| Model     | Similarity Threshold | SN (%)      | SP (%)      | ACC (%)     | MCC          | AUC          |
|-----------|----------------------|-------------|-------------|-------------|--------------|--------------|
| Universal | N/A                  | 48.7        | 88.9        | 86.4        | 0.267        | 0.790        |
| Dynamic   | 90%                  | 49.5        | 89.5        | 87.0        | 0.281        | 0.795        |
|           | 80%                  | 50.1        | 89.9        | 87.5        | 0.292        | 0.799        |
|           | 70%                  | 50.7        | 90.9        | 88.4        | 0.312        | 0.803        |
|           | 60%                  | 51.1        | 90.8        | 88.3        | 0.313        | 0.804        |
|           | <b>50%</b>           | <b>51.6</b> | <b>90.8</b> | <b>88.3</b> | <b>0.316</b> | <b>0.808</b> |
|           | 40%                  | 50.9        | 90.8        | 88.3        | 0.312        | 0.803        |

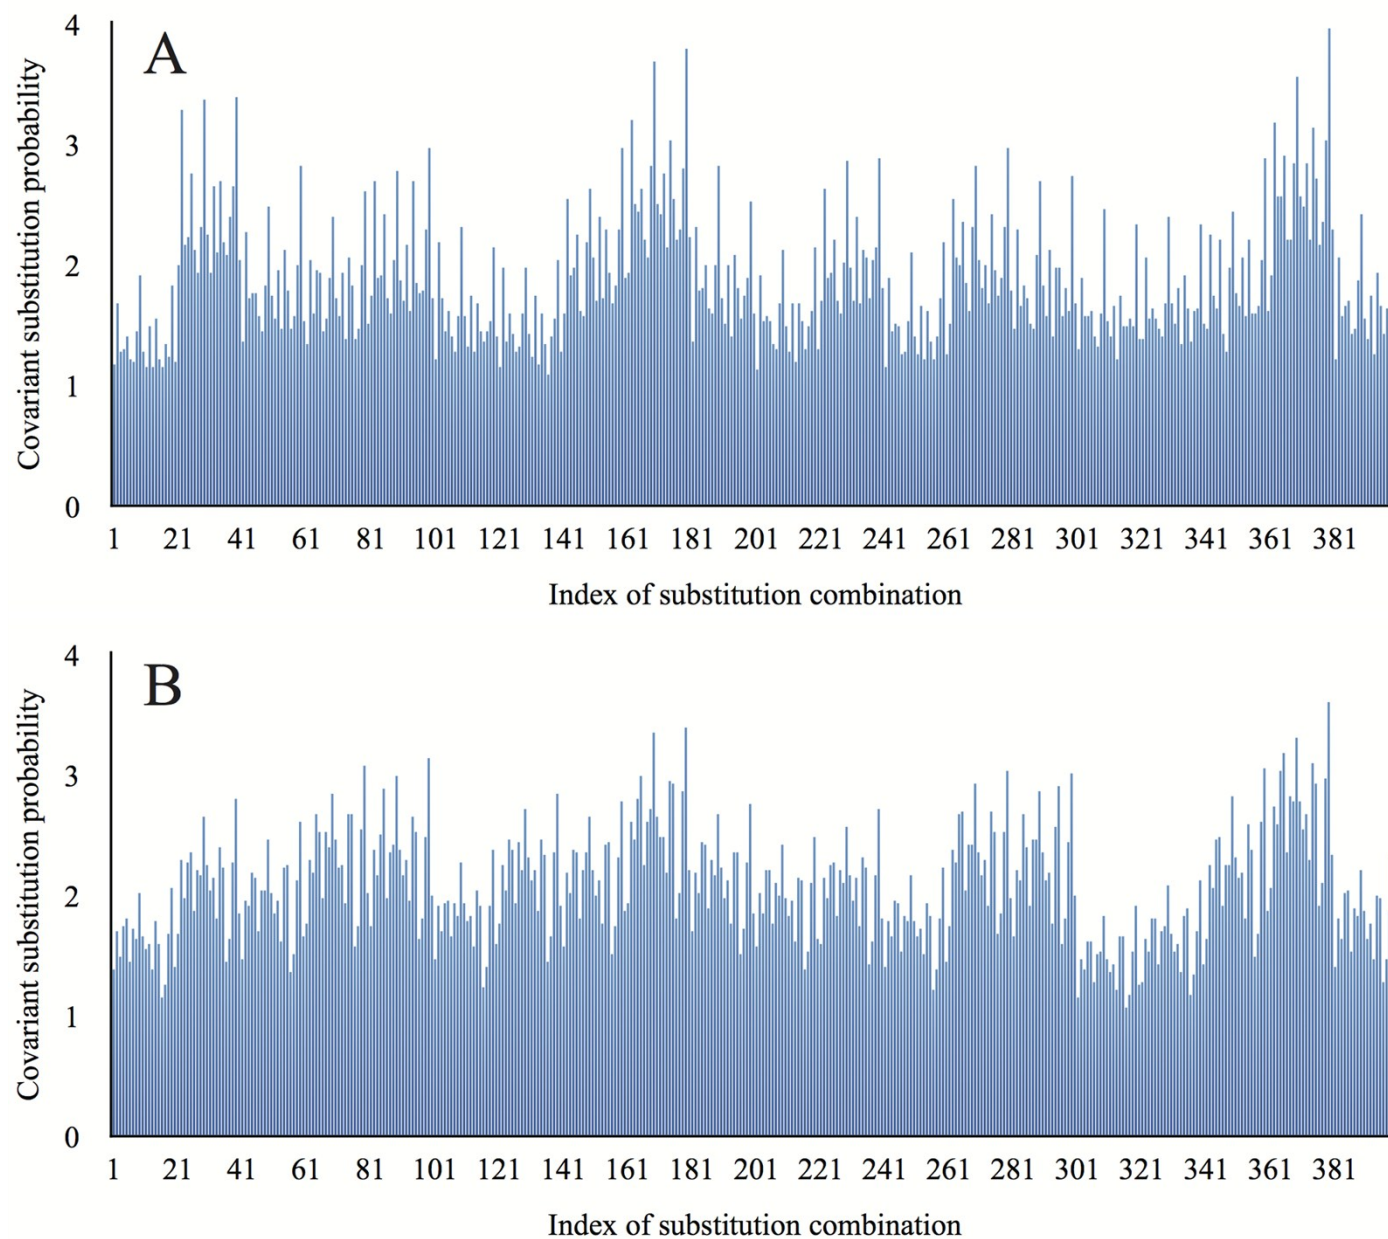

Supplementary Figure S1. The distribution of (A) DBRs- and (B) non-DBRs-related CSP.

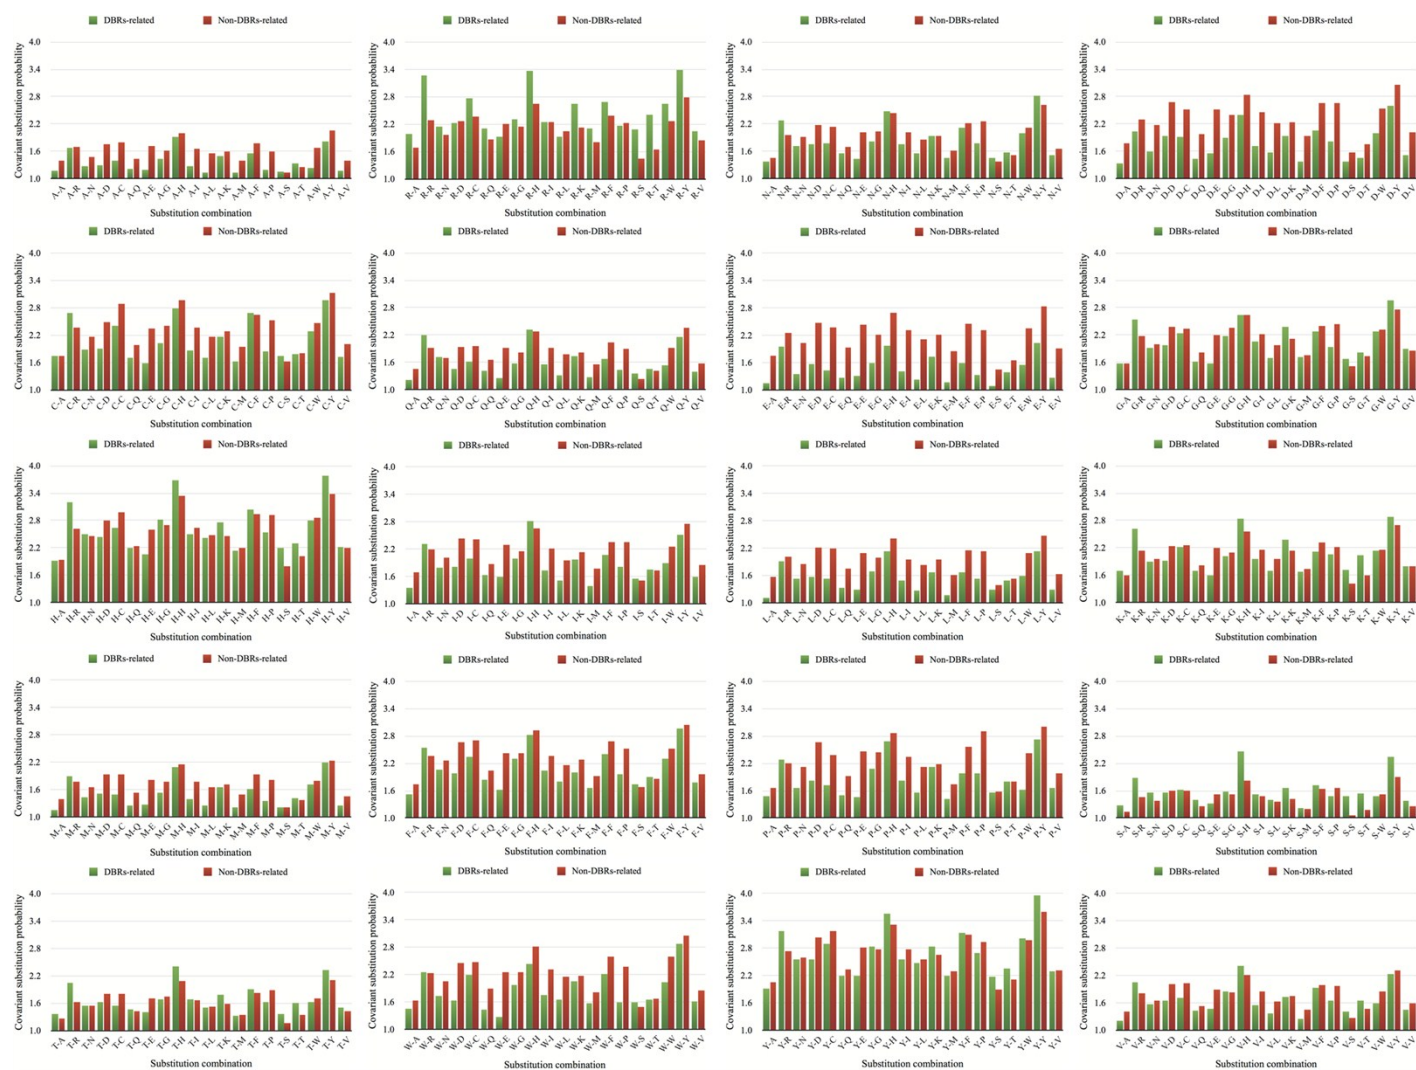

Supplementary Figure S2. CSP of different substitution combinations.

Dataset with DNA-binding proteins with annotations based on the 3.5Å cut-off.

Each protein chain was represented using three lines:

| 1: PDB ID | Embodiment in Sample pool (and) PDNA-512 or in PDNA-41 |
|-----------|--------------------------------------------------------|
|-----------|--------------------------------------------------------|

## 2: Amino acid sequence

### 3: DNA binding annotation (1 binding, 0 non-binding)

[illegible]



[illegible]









[illegible]

[illegible]

[illegible]

[illegible]

[illegible]

[illegible]





[illegible]

[illegible]

[illegible]

[illegible]





[illegible]



[illegible]







[illegible]



[illegible][illegible][illegible][illegible][illegible][illegible]

20aa8\_B      Embody in Sample pool  
QTLPHGHQTLFLFDLEATGLPSSRPEVTELLCLAVHRRALNENTSQGHPPVPVRPRVVDKLSLCIAPGKACSPGASEITGLSKAELEVQGRQFDDNLAILRAFLRQQPCCLVAHNGDRYDFPLQLTELARLSTPSPLDGTGFCVDSIAALKALEQASRKSYSLSGSYTRLVWQAPTDSHTAEAGDVLTLISICQWKQPALL  
QVVDDEHARFSTSVKPYGTA

20f1 A Embody in Sample pool  
QRCDDWVSQDPLIYAHDNENWGVPETDSRKLFEICLEGQQAGLSWITVLKKREYNRACFHQDFPIRIAAQEEDVERLLQNTGIRHRIQGIAISNARAWLAEQNGESADFVWSFSDVQGPQTQAASLDKJPTSPASDALAKALKRGKFGVTTICYSFQACGLVDNHITGFCFHPG

2ok0\_H Embody in Sample pool  
VQLQEESGPKVPKPGASVKSCKASGYTFTDYMNWLRLQKPGQGLEWVGSGSIKYNKFKDKATLTADTSSSYVYMHLSDDNAVYFCTRWTGSGFDYWEGETLLTPSSAKTTPPSVYPLAPGSAATQNSMTVLGCLVKGGYFPEPTVTVNNGSLSGSVHTFPAVLQSDLYTLSSSVTPSPSTWPESETVTCNAVHPAS  
STKVQDKVIR

2ak0 L Embody in Sample pool  
LMLDTQTPLSLPSYLGDQASICRSSNGNTYLEWLYKPGQSPILLIYVSNRFGVPDRFSGSGSDFTLKISRVEAEDLGVYYCFQGSHPILFGAGTKLEVKRSDAAPTSIIFPPSSEQLTSGGAVVCFLLNNFYPKDINVKWKIDGSEERQNGVILNSWTDQSKDSTYSMSSTLTLLTKDEYERHNSYTCETHIKTSTSPV  
VKSFRNNEC

2024\_A Embody in Sample pool  
PQGEIRRAADNLAAIAKPKPLTDVWFAFPQKLTYSQSLIGQHVHTHETRGKALLTHFSNDLTLYSHNQLYGVWRVVDTEGEPQTTTRVLRVKLQTADKTYLLSYASDIEMLRPEQLTHHPFLQRVGPVDLPNLTVVKKERLLSPFRNRQFAGLLLDQAFLAGLGNLYRVEILWVQVLTGNHKAARDLNAAQDLALAH  
ALLIEPRFSYATRGLFRKVFVHRDGEPCERCSIIKLTLSRSPFYWPCGQH

[illegible][illegible][illegible]

Keyfz\_LD Embody in Sample pool  
20YU1VQGDSDIFRSDSGRRTREVEYKPSLFAHCPSQKTYFYDYGKPKTRKLFANMRDASQWIKRMEDJLEALGMDGLKLYLSDTYNYEIKYDHTKIRVANFDIEVTPDGGFPEPSQAKHPDIAITHYDSIDRFFYFDLLNSPYGNVWNEWSEIAAGDVEVPSHDIJKYIMPFDEKLELMEYLFNQWQKTPV  
ILYLVNWNVEAPYVYVNRKNGESTAGFKRLSPKRMKQVNIENYSGREIITLFGSVLYDILYKFSFYNIYSEIFELNGLYDYGKPSIKLEKSHQIRYANVRYLQDAGKROFINLSDMGYAKJQJGVSEYSPKITUWDAIFNSLQNKQVPOGRSHVPYVYFAGVCEGPPKPNRYKVMFSDLYLPSYIR  
OVN5PSEITAGTEGVAPYHJYNAVAPSRSDVQSPHMKWYKDRBGVPTHTIEVNORHKYKMAI AORNGEIKFAFP DNVYRDEDFEIKKRIKAKSINIMFIARQETAEYKADIAONRKLILSNGYQJQNVSEYFENRATATTGGAQOAWIKRWENYVNGYVNGFVATGPDYVGTDSIVYSAKAD

[illegible]

2p2r\_A      Embody in Sample pool  
QTTSHELTIPNDLIGCIIRQGAKINEIRQSGAQIKIANPVEGSTDRQVTITGSAASISLAQYLINVRLSSE

2p5e Embody in Sample pool

KEYFLIVEIQDISIFRSDISNGRERTREHYKPSLFAHCPEQSQATKYDFIDQKPCTRKLFANDRASQWIKREDGLEALGDDFLKAYLSDTYNIEYKHDTKIRVANFDEIVTSPDGFPEPSQAKHPIDATHIYSDIDRRFYFVDFLNSPYGNVEEWSIEIAAKLQEGGDEVPSIEKDIIKHYFDNEKELLEFLYFNWQOKTPVIL  
TGWNEASFAPYVYRNKIRIGESTAKRLSPHEKTRKRVKIENYGRSEIITLFGISVLDYIDLKKFSFTNPQSYLSDIYESLNVGLKVLQDGPSIKLSRESHQRYBSYNIAAYRVILQIDAKQRFINLSDGYAKIQOQSVFPIKTDALFINSLKEQNKVQPGRSHQPYPGAGFVGEKPIPNRYKVSFDTLS.YPSIRQVNSP

[illegible][illegible][illegible][illegible][illegible][illegible][illegible][illegible]

2ppb\_D      Embody in Sample pool



[illegible]

[illegible]



40



[illegible]



[illegible]

[illegible]





[illegible]

[illegible]



[illegible]

[illegible]

[illegible]



[illegible]

[illegible]



[illegible]
